# Supplementary material for: RAL-1 controls multivesicular body biogenesis and exosome secretion
Source: PubMed Central journal article supplement — J Cell Biol. 2015 Oct 12;211(1):27–37. doi: 10.1083/jcb.201504136 (PMC4602040; doi:10.1083/jcb.201504136), 2015-10-12
Supplement: supp_jcb.201504136_JCB_201504136_sm.pdf [file supp_jcb.201504136_JCB_201504136_sm.pdf]

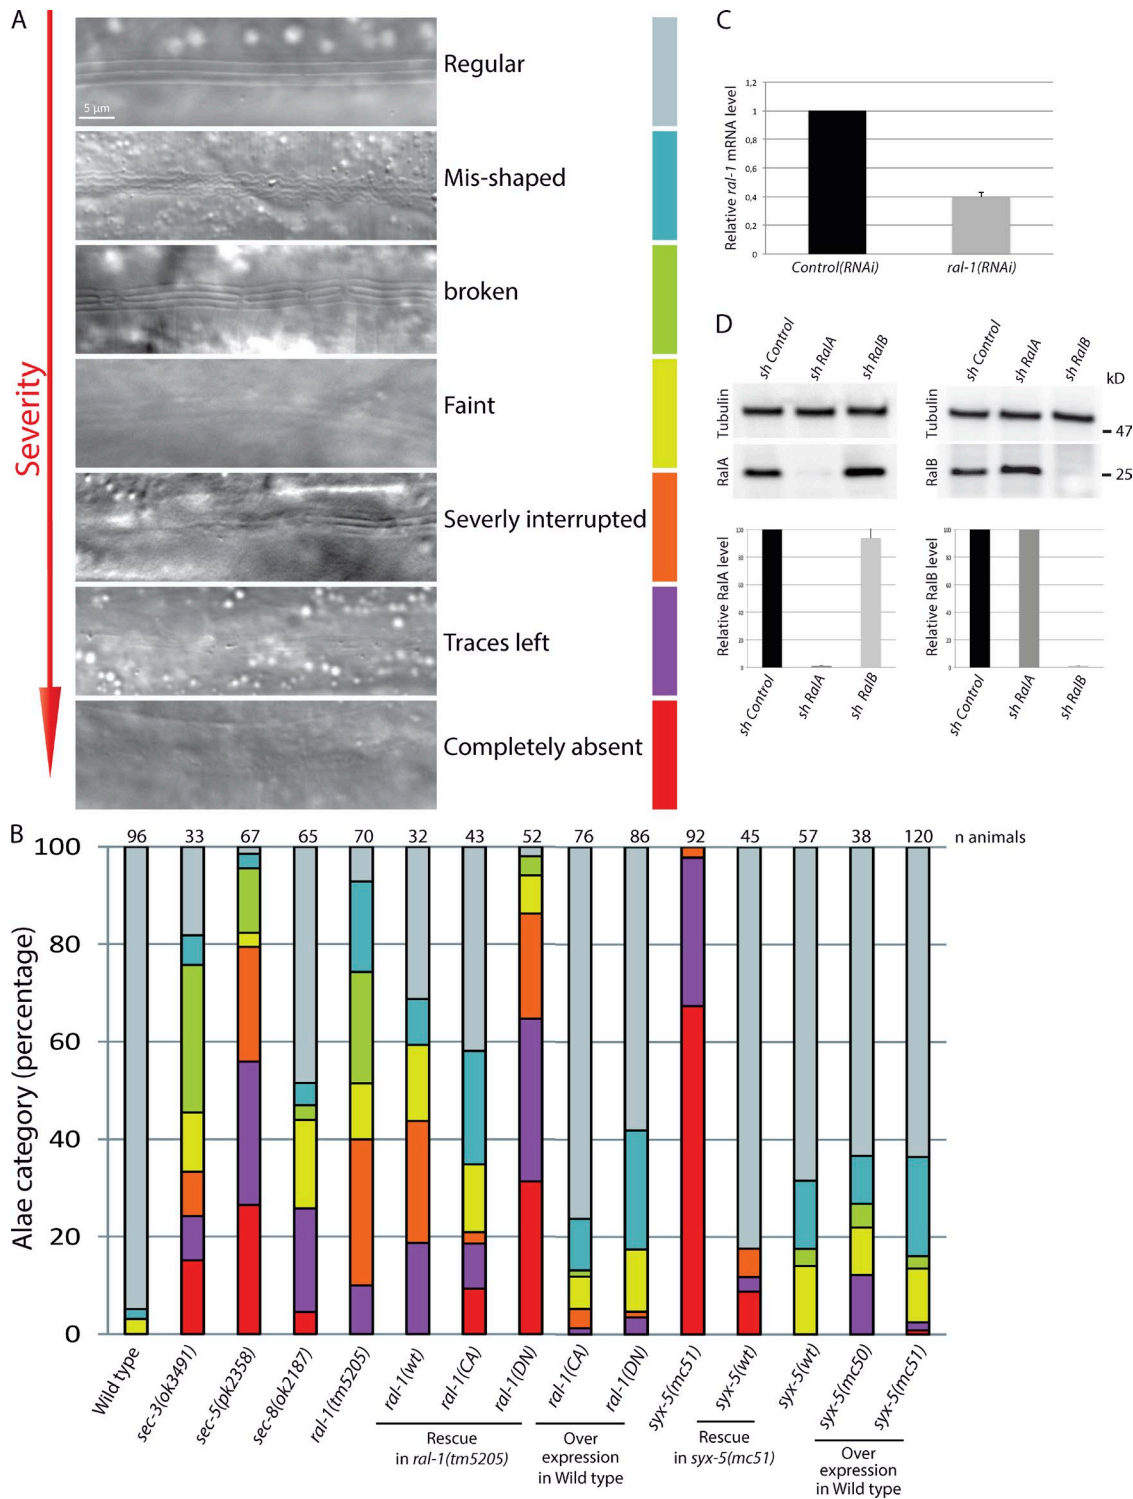

Figure S1. **Classification of alae defects.** (A) Examples of the different categories of alae defects. (B) Percentage of each category of alae defect in the different genotypes. The number of animals analyzed in each genotype is provided above the graph. (C) Quantitative RT-PCR experiments establishing that *ral-1*(RNAi) decreases *ral-1* mRNA levels by 60% compared with *control*(RNAi) (mean of two independent experiments; quantitative RT-PCR performed in triplicate). (D) Western blots of RalA and RalB in 4T1 mice mammary tumor cells stably expressing sh control, sh RalA or sh RalB. Quantification over cellular tubulin, normalized to control (mean of two experiments) reveals a strong efficiency (>98% reduction compared with control). Errors bars, SD.

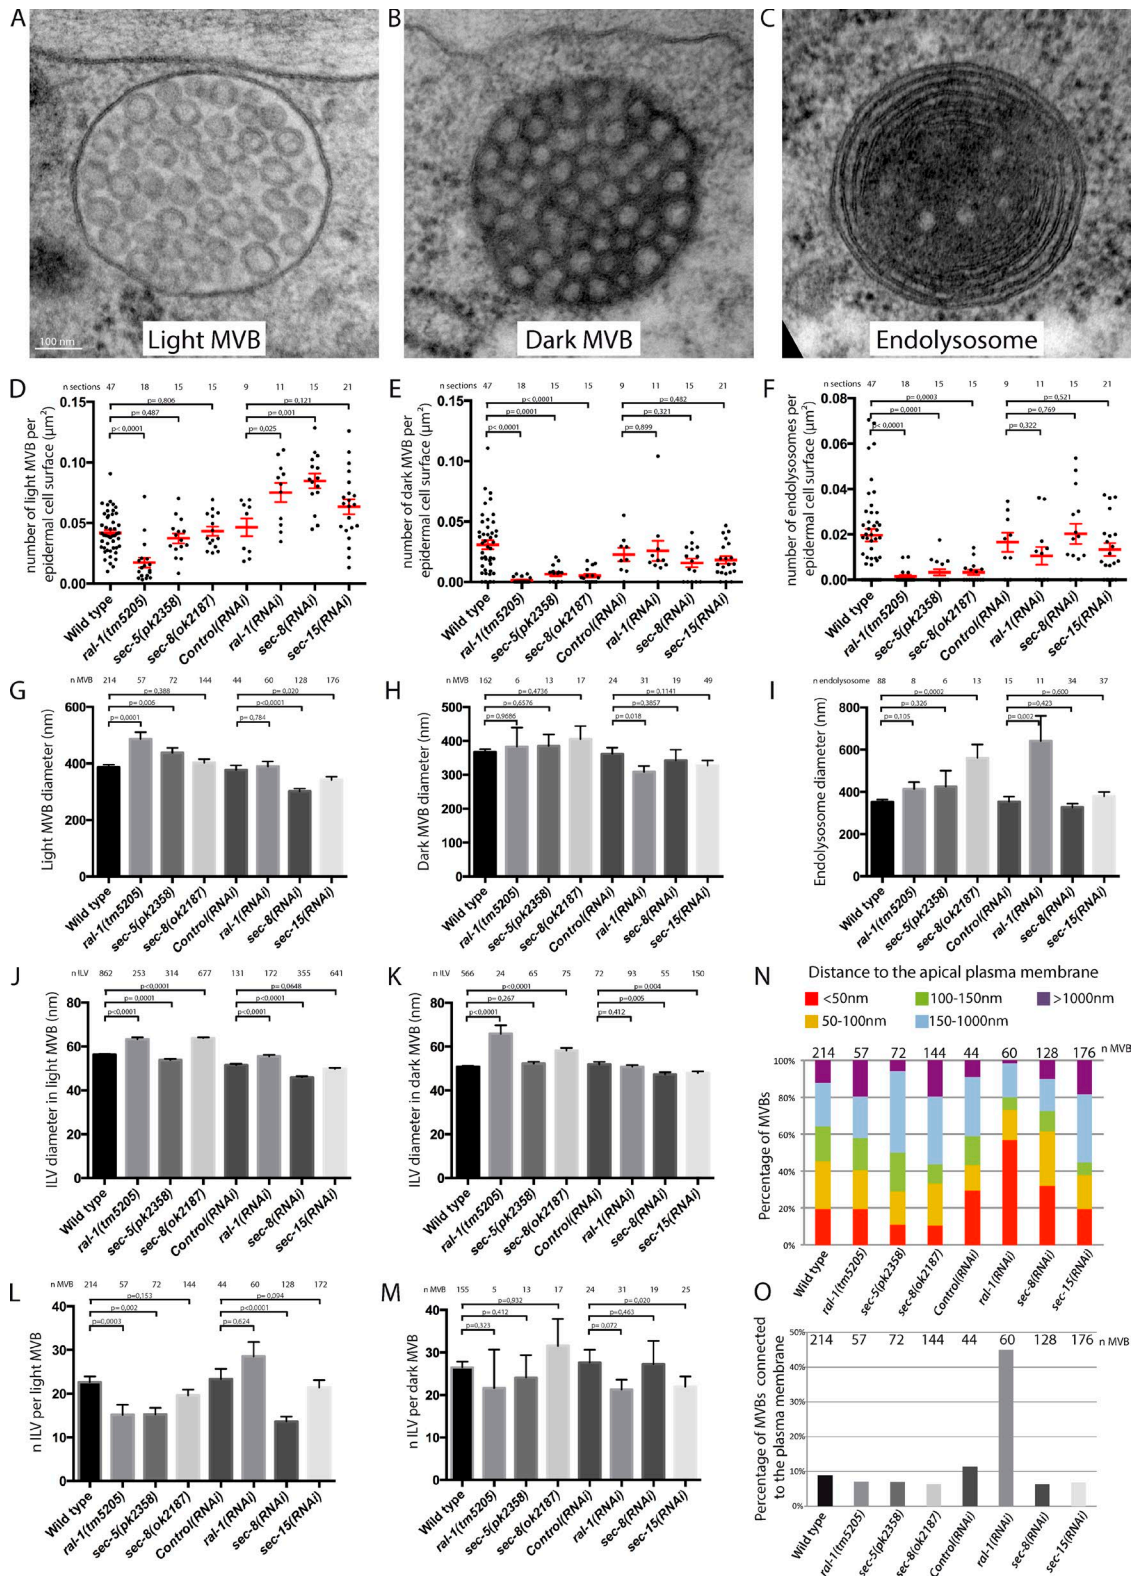

Figure S2. **Systematic and quantitative analysis of MVBs and endolysosomes by electron microscopy.** (A–C) Examples of the different types of MVBs and endolysosomes. (D–M) Graphics representing the density (D–F), diameter (G–I), ILV diameter (J and K), and number of ILVs per MVB surface (L and M) in the case of light MVBs (D, G, J, and L), dark MVBs (E, H, K, and M), and endolysosomes (F and I) in WT, RNAi, and mutant animals. P values are indicated above the graphs (Mann-Whitney test). Numbers above the graphs indicate the numbers of sections in D–F; MVBs in G, H, and L–O; endolysosomes in I; and ILVs in J and K. (N) Distance between MVBs and the apical plasma membrane. (O) Percentage of MVBs connected to the apical plasma membrane. Error bars, SD.

Table S1. Genes identified in the RNAi screen for alae defects

| Gene            | Clone       | Category          |
|-----------------|-------------|-------------------|
| <i>arf-3</i>    | F57H12.1    | Small GTPase      |
| <i>ral-1</i>    | Y53G8AR     | Small GTPase      |
| <i>rab-1</i>    | C39F7.4     | Small GTPase      |
| <i>rab-2</i>    | F53F10.4    | Small GTPase      |
| <i>rab-7</i>    | W03C9.3     | Small GTPase      |
| <i>rab-8</i>    | D1037.4     | Small GTPase      |
| <i>rab-11</i>   | F53G12.1    | Small GTPase      |
| <i>rab-27</i>   | Y87G2A.4    | Small GTPase      |
| <i>rab-35</i>   | Y47D3A.25   | Small GTPase      |
| <i>rab-39</i>   | D2013.1     | Small GTPase      |
| <i>sec-8</i>    | Y106G6H.7   | Exocyst           |
| <i>sec-10</i>   | C33H5.9     | Exocyst           |
| <i>sec-15</i>   | C28G1.3     | Exocyst           |
| <i>exoc-8</i>   | Y105E8B.2   | Exocyst           |
| <i>cdc-42</i>   | R07G3.1     | Cytoskeleton      |
| <i>gei-4</i>    | W07B3.2     | Cytoskeleton      |
| <i>byn-1</i>    | F57B9.5     | Cytoskeleton      |
| <i>pes-7</i>    | F09C3.1     | Cytoskeleton      |
| <i>evl-20</i>   | F22B5.1     | Cytoskeleton      |
| <i>arx-2</i>    | K07C5.1     | Cytoskeleton      |
| <i>ani-1</i>    | Y49E10.19   | Cytoskeleton      |
| <i>Y19D2B.1</i> | Y19D2B.1    | Cytoskeleton      |
| <i>flna-1</i>   | C23F12.1    | Cytoskeleton      |
| <i>goa-1</i>    | C26C6.2     | Cytoskeleton      |
| <i>hgrs-1</i>   | C07G1       | pre-ESCRT         |
| <i>tsg-101</i>  | C09G12      | ESCRT             |
| <i>vps-28</i>   | Y87G2A      | ESCRT             |
| <i>vps-37</i>   | CD4.4       | ESCRT             |
| <i>vps-25</i>   | W02A11.2    | ESCRT             |
| <i>vps-22</i>   | C27F2.5     | ESCRT             |
| <i>vps-36</i>   | F17C11.8    | ESCRT             |
| <i>vps-20</i>   | Y65B4A.3    | ESCRT             |
| <i>vps-32</i>   | C56C10.3    | ESCRT             |
| <i>vps-4</i>    | Y34D9A.10   | ESCRT disassembly |
| <i>tfg-1</i>    | Y63D3A.5    | ER-Golgi          |
| <i>syx-5</i>    | F55A11.2    | ER-Golgi          |
| <i>sft-4</i>    | C54H2.5     | ER-Golgi          |
| <i>emc-2</i>    | Y57G7A.10   | ER-Golgi          |
| NA              | ZK686.3     | ER-Golgi          |
| <i>npp-20</i>   | Y77E11A.13a | ER-Golgi          |
| <i>soap-1</i>   | C13F10.4    | Secretion         |
| <i>lpr-5</i>    | W04G3.2     | Secretion         |
| <i>ify-1</i>    | C27A2.3     | Cell division     |
| <i>ect-2</i>    | T19E10.1    | Cell division     |
| <i>paa-1</i>    | F48E8.5     | Cell division     |
| <i>R08D7.1</i>  | R08D7.1     | Cell division     |
| <i>cdc-48.3</i> | K04G2.3     | Cell division     |
| <i>cki-1</i>    | T05A6.1     | Cell division     |
| <i>xpo-2</i>    | Y48G1A_54.b | Cell division     |
| <i>bub-1</i>    | R06C7.8     | Cell division     |
| <i>cdk-9</i>    | H25P06.2a   | Cell division     |
| <i>plk-1</i>    | C14B9.4     | Cell division     |
| <i>cdk-1</i>    | T05G5.3     | Cell division     |
| <i>cdk-4</i>    | F18H3.5a    | Cell division     |
| <i>spd-1</i>    | Y34D9A.4    | Cell division     |
| <i>let-92</i>   | F38H4.9     | Other             |
| <i>nekl-2</i>   | ZC581.1     | Other             |
| <i>vhp-1</i>    | F08B1.1     | Other             |
| <i>vha-9</i>    | ZK970.4     | Other             |
| <i>ccdc-55</i>  | C16C10.6    | Other             |
| NA              | T22H9.1     | Other             |

Table S1. Genes identified in the RNAi screen for alae defects (Continued)

| Gene            | Clone      | Category |
|-----------------|------------|----------|
| <i>chp-1</i>    | Y110A7A.13 | Other    |
| <i>dcp-66</i>   | C26C6.5    | Other    |
| <i>cdt-2</i>    | T01C3.1    | Other    |
| NA              | F25H9.6    | Unknown  |
| NA              | Y6B3B.9    | Unknown  |
| <i>smg1-1</i>   | F20G4.1    | Unknown  |
| <i>F52C6.13</i> | F52C6.13   | Unknown  |
| <i>D1043.1</i>  | D1043.1    | Unknown  |
| <i>C14C10.4</i> | C14C10.4   | Unknown  |
| <i>srh-49</i>   | C10G11.4   | Unknown  |
| NA              | Y41D4B.11  | Unknown  |
| NA              | C23H3.5    | Unknown  |

Table S2. Quantification of alae defects

| Animals                                                    | Percentage of alae defects | SE   | No. of animals observed | No. of experiments | Mann-Whitney <sup>a</sup> |
|------------------------------------------------------------|----------------------------|------|-------------------------|--------------------|---------------------------|
| <b>Adult animals</b>                                       |                            |      |                         |                    |                           |
| WT                                                         | 4.25                       | 2.02 | 96                      | 6                  | NA                        |
| <i>sec-3(ok3491)</i>                                       | 86.1                       | 7.12 | 33                      | 3                  | 0.0238                    |
| <i>sec-5(pk2358)</i>                                       | 97.05                      | 1.71 | 67                      | 4                  | 0.0095                    |
| <i>sec-8(ok2187)</i>                                       | 50.85                      | 3.27 | 65                      | 4                  | 0.0139                    |
| <i>exoc-7(ok2006)</i>                                      | 25.26                      | 3.11 | 22                      | 3                  | 0.025                     |
| <i>exoc-8(ok2523)</i>                                      | 42.91                      | 2.13 | 34                      | 3                  | 0.025                     |
| <i>ral-1(tm5205)</i>                                       | 93.86                      | 2.24 | 70                      | 4                  | 0.0095                    |
| Rescued <i>ral-1(tm5205) pdpy-7::ral-1(WT)</i> , 1 ng      | 68.75                      | 0.95 | 32                      | 2                  | 0.1333                    |
| Rescued <i>ral-1(tm5205) pdpy-7::ral-1(CA)</i> , 1 ng      | 59.86                      | 8.43 | 43                      | 4                  | 0.0286                    |
| Rescued <i>ral-1(tm5205) pdpy-7::ral-1(DN)</i> , 1 ng      | 98.24                      | 1.75 | 52                      | 3                  | 0.4                       |
| Overexpression of RAL-1(CA), 10 ng                         | 24.23                      | 6.79 | 76                      | 4                  | 0.0325                    |
| Overexpression of RAL-1(DN), 10 ng                         | 39.97                      | 4.88 | 86                      | 5                  | 0.0043                    |
| <b>L1 animals</b>                                          |                            |      |                         |                    |                           |
| <i>syx-5(mc51)<sup>b</sup></i>                             | 100                        | 0    | 92                      | 4                  | 0.0095                    |
| Rescued <i>syx-5(mc51)</i> by <i>syx-5(wt)<sup>c</sup></i> | 11.24                      | 1.72 | 35                      | 3                  | 0.0571                    |
| <b>Adult animals</b>                                       |                            |      |                         |                    |                           |
| Overexpression of SYX-5(WT)                                | 29.39                      | 8.66 | 57                      | 4                  | 0.0667                    |
| Overexpression of SYX-5(mc50)                              | 32.13                      | 8.17 | 38                      | 3                  | 0.0476                    |
| Overexpression of SYX-5(mc51)                              | 38.76                      | 8.2  | 120                     | 5                  | 0.0043                    |

Here all types of alae defects are combined. However, their severity can vary (see Fig. S1 for details).

<sup>a</sup>The Mann-Whitney test was performed with WT animals, except for the rescue experiments in which it was performed with mutant animals.

<sup>b</sup>*syx-5(mc50)* and *syx-5(mc51)* show the same phenotype: 68% of animals have invisible alae, and 32% have visible alae with major defects.

<sup>c</sup>For *syx-5(mc51)* rescue, alae defects are rescued, although alae were not always continuous. Rescued animals could reach adulthood (with alae) but failed to give rise to progeny.

Table S3. Strains used in this study

| Strain | Genotype                                                                                                         |
|--------|------------------------------------------------------------------------------------------------------------------|
| N2     | Bristol                                                                                                          |
| NL2099 | <i>rrf-3(pk1426)</i>                                                                                             |
| VC2836 | <i>+/szT1 [lon-2(e678)] I; sec-3(ok3491)/szT1 X</i>                                                              |
| DV2689 | <i>sec-5(pk2358)/mln1 [dpy-10(e128) mls14] II</i>                                                                |
| VC2648 | <i>sec-8(ok2187) I/hT2 [bli-4(e937) let?(q782)qls48] (I,III)</i>                                                 |
| FT1411 | <i>ral-1(tm5205)/qC1III</i>                                                                                      |
| RB1630 | <i>exoc-7(ok2006) I</i>                                                                                          |
| RB1928 | <i>exoc-8(ok2523) I</i>                                                                                          |
| ML2339 | <i>syx-5(mc50)/+</i>                                                                                             |
| ML2340 | <i>syx-5(mc51)/+</i>                                                                                             |
| ML2376 | <i>syx-5(mc51)/oxTi711 [pelt-3::H2B::tomato]</i>                                                                 |
| ML1783 | <i>mcEX586[psec-8::sec-8::gfp; pvha-5::vha-5::mrfp; pttx-3::gfp]</i>                                             |
| ML2311 | <i>mcEX858[psec-15::sec-15::gfp; pvha-5::vha-5::rfp; pttx-3::gfp]</i>                                            |
| ML2309 | <i>mcEX856[pral-1::yfp::ral-1; pvha-5::vha-5::rfp; pmyo-2::mCherry]</i>                                          |
| ML2040 | <i>mcEX702[pdpy-7::gfp::ral-1(CA); pvha-5::vha-5::rfp; pmyo-2::mCherry]</i>                                      |
| ML2199 | <i>mcEX806[pdpy-7::gfp::ral-1(DN); pvha-5::vha-5::rfp; pmyo-2::mCherry]</i>                                      |
| ML2033 | <i>mcEX695[pdpy-7::gfp::syx-5; pvha-5::vha-5::rfp; pmyo-2::mCherry]</i>                                          |
| ML2034 | <i>mcEX696[pdpy-7::gfp::ral-1(CA); pmyo-2::mCherry]</i>                                                          |
| ML2037 | <i>mcEX699[pdpy-7::gfp::ral-1(DN); pmyo-2::mCherry]</i>                                                          |
| ML2400 | <i>ral-1(tm5205)/qC1 mcEX905[pral-1::yfp::ral-1(wt); pmyo-2::gfp]</i>                                            |
| ML2313 | <i>ral-1(tm5205)/qC1 mcEX(860)[pdpy-7::gfp::ral-1(CA); pttx-3::gfp]</i>                                          |
| ML2314 | <i>ral-1(tm5205) mcEX(861)[pdpy-7::gfp::ral-1(DN); pttx-3::gfp]</i>                                              |
| ML2369 | <i>mcEX893[pdpy-7::apex::ral-1(DN); pmyo-2::mCherry]</i>                                                         |
| ML2324 | <i>mcEX871[pdpy-7::gfp::syx-5; pmyo-2::mCherry]</i>                                                              |
| ML2325 | <i>mcEX872[pdpy-7::gfp::syx-5(mc50); pmyo-2::mCherry]</i>                                                        |
| ML2331 | <i>mcEX878[pdpy-7::gfp::syx-5(mc51); pmyo-2::mCherry]</i>                                                        |
| ML2158 | <i>mcEX775[pdpy-7::gfp::syx-5; pdpy-7::mCherry::ral-1(CA); pmyo-2::mCherry]</i>                                  |
| ML2153 | <i>mcEX770[pdpy-7::gfp::syx-5; pdpy-7::mCherry::ral-1(DN); pmyo-2::mCherry]</i>                                  |
| ML2399 | <i>syx-5(mc51)/oxTi711 [pelt-3::H2B::tomato] mcEX904[psyx-5::gfp::syx-5; pmyo-2::mCherry]</i>                    |
| ML2375 | <i>ral-1(tm5205)/qC1; mcSi56[pCbr-unc-119::Cbr-unc-119(+); pvha-5::vha-5[E830q)::mRFP1]II; unc-119(ed3)IIIss</i> |
